# Supplementary material
Source: publisher site journal article supplement (https://www.kjim.org/upload/media/kjim-2020-058-suppl.pdf)

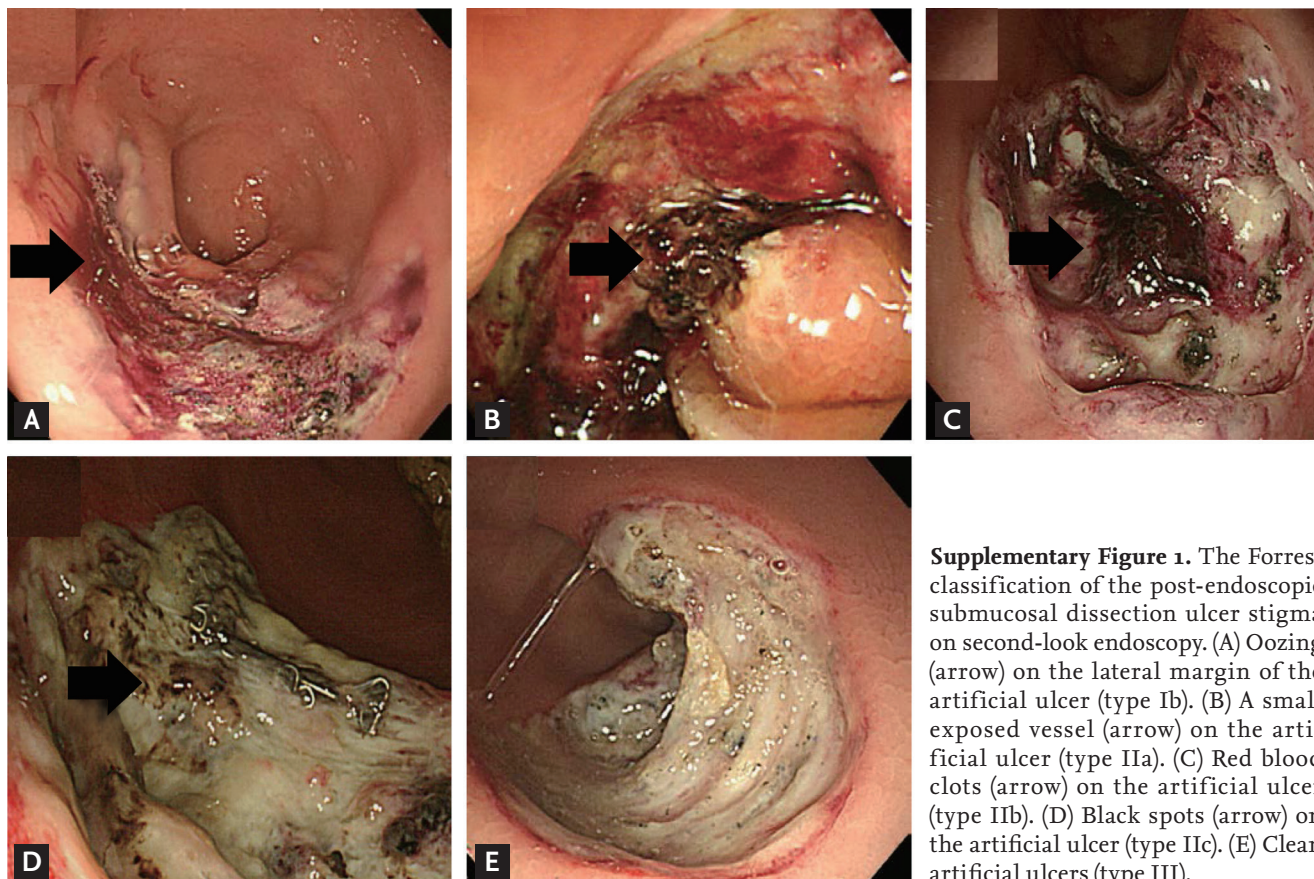

Supplement: Supplementary file 1 [file kjim-2020-058-suppl.pdf]
